# Supplementary material for: Self-Healable and Super-Tough Double-Network Hydrogel Fibers from Dynamic Acylhydrazone Bonding and Supramolecular Interactions
Source: MDPI journal article supplement (doi:10.3390/gels8020101), 2022-02-08
Supplement: s1 [file s1]

# Self-Healable and Super-Tough Double-Network Hydrogel Fibers from Dynamic Acylhydrazone Bonding and Supramolecular Interactions

Jiachuan Hua <sup>1</sup>, Chang Liu <sup>1</sup>, Bin Fei <sup>1,\*</sup> and Zunfeng Liu <sup>2</sup>

<sup>1</sup> Institute of Textiles and Clothing, The Hong Kong Polytechnic University, Hong Kong 999077, China; jc.hua@connect.polyu.hk (J.H.); judyc.liu@connect.polyu.hk (C.L.)

<sup>2</sup> Key Laboratory of Functional Polymer Materials, College of Chemistry, Nankai University, Tianjin 300071, China; liuzunfeng@nankai.edu.cn

\* Correspondence: bin.fei@polyu.edu.hk

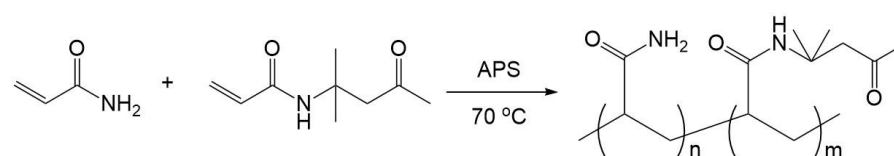

**Figure S1.** Scheme of radical copolymerization of PAD.

**Table S1.** Molecular weight (Mw) and polydispersity of synthesized polymers determined by GPC.

| Polymers | DAAM feeding ratio (mol%) | Mw (kDa) | PDI  |
|----------|---------------------------|----------|------|
| PAM      | 0                         | 220      | 1.57 |
| PAD-1    | 1.0                       | 235      | 1.62 |
| PAD-5    | 5.0                       | 239      | 1.61 |
| PAD-10   | 10.0                      | 243      | 1.64 |

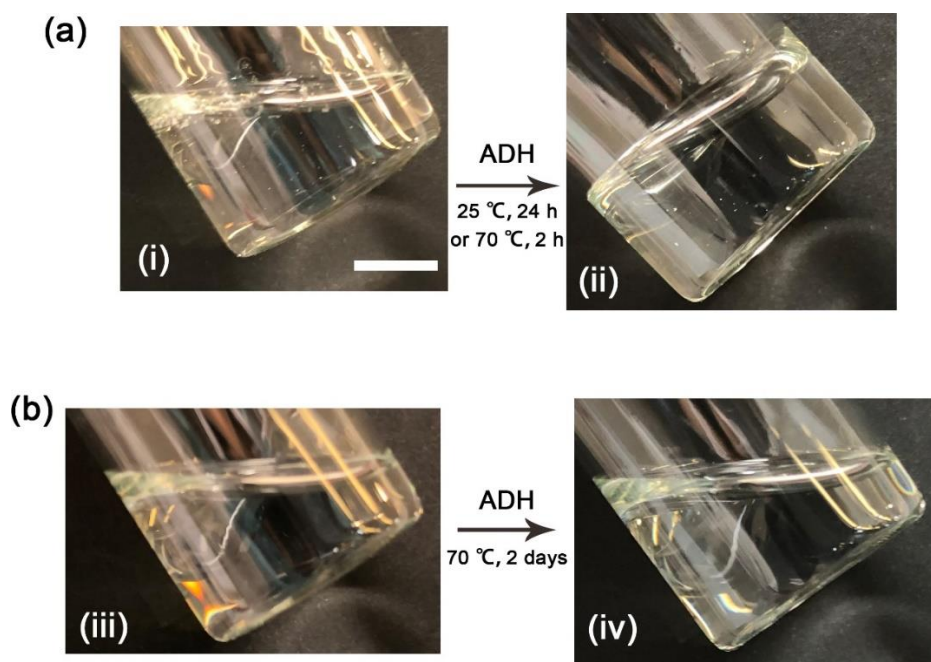

**Figure S2.** (a) Synthesis of PAD hydrogel; (i) PAD aqueous solution (6 wt%); (ii) crosslinked PAD SN hydrogel. (b) No gelation occurred in PAM solution; (iii) PAM aqueous solution (6 wt%); (iv) PAM and ADH mixture solution (All images share the same scale bar of 1 cm).

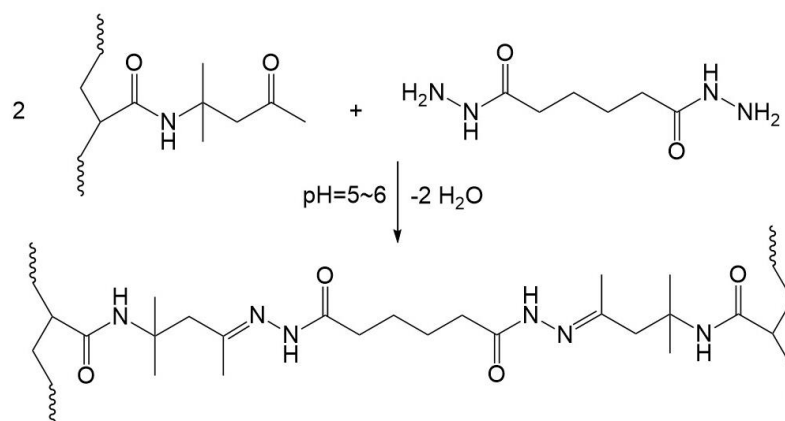

**Figure S3.** Crosslinking reaction between DAAM units on PAD and ADH (pH condition correspond to reaction in Figure S2a).

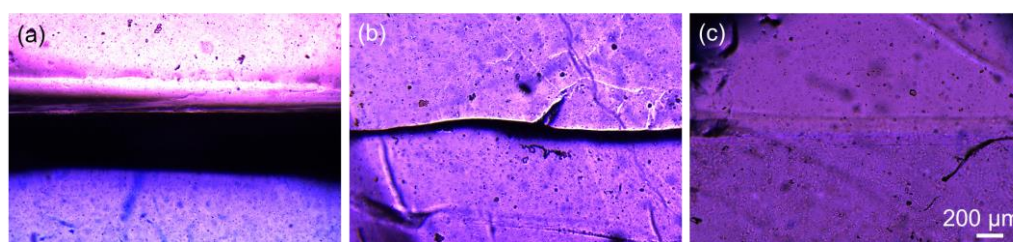

**Figure S4.** Interface crosssection images of PAD-5/IC hydrogel segments with healing time of (a) 0, (b) 2 and (c) 4 hours (dye stained: above by rhodamine B, below by methylene blue).

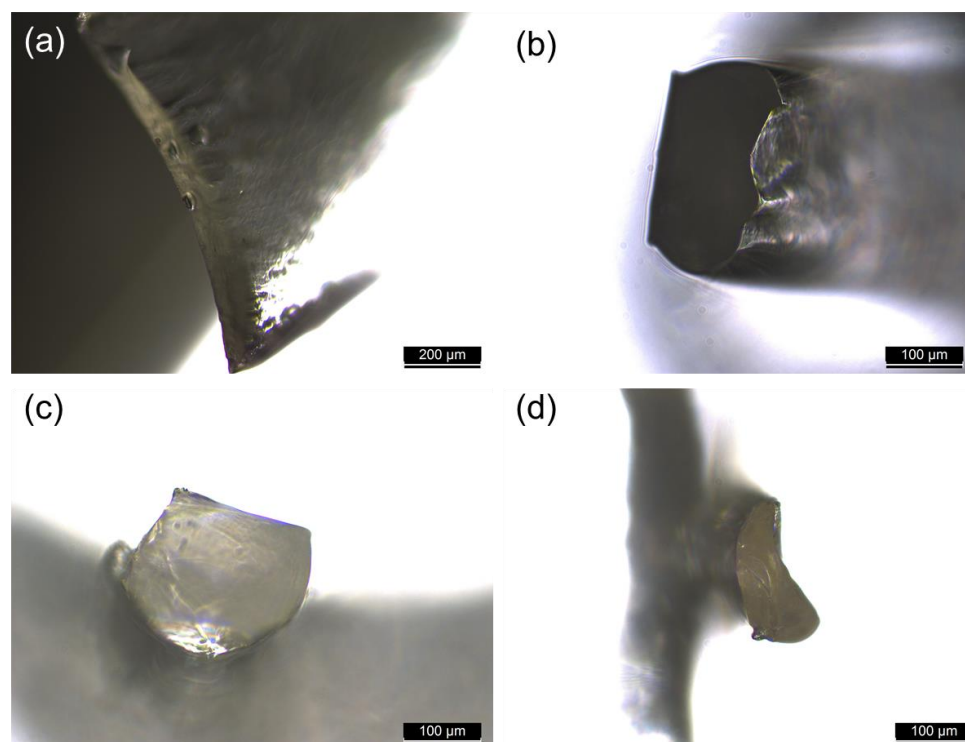

**Figure S5.** Crosssection images of (a) DR1, (b) DR2, (c) DR4 and (d) DR8 PAD/IC fibers.
